# Supplementary material for: Ag@ZIF-8/g-C3N4 Z-scheme photocatalyst for the enhanced removal of multiple classes of antibiotics by integrated adsorption and photocatalytic degradation under visible light irradiation
Source: Royal Society of Chemistry journal article supplement (doi:10.1039/d2ra02194c), 2022-01-01
Supplement: d2ra02194c1.pdf [file d2ra02194c1.pdf]

Electronic Supporting Material on RSC Advances entitled  
“Ag@ZIF-8/g-C<sub>3</sub>N<sub>4</sub> Z-scheme photocatalyst for the enhanced  
removal of multiple classes antibiotics by integrated adsorption and  
photocatalytic degradation under visible light irradiation”

Xin Guo<sup>‡</sup>, Siyuan He<sup>‡</sup>, Zhe Meng<sup>\*</sup>, Yinghui Wang, Yuan Peng

State Key Laboratory of High-efficiency Utilization of Coal and Green Chemical  
Engineering, National Demonstration Center for Experimental Chemistry Education,  
College of Chemistry and Chemical Engineering, Ningxia University, Yinchuan  
750021, China

<sup>‡</sup> These authors contributed equally.

\*Corresponding author:

Prof. Zhe Meng, State Key Laboratory of High-Efficiency Utilization of Coal and Green Chemical  
Engineering, College of Chemistry and Chemical Engineering, Ningxia University, Yinchuan  
750021, China. Tel: +86 951 2061224; Fax: +86 951 2061231. Email: [meng\\_z@nxu.edu.cn](mailto:meng_z@nxu.edu.cn)

To further elucidate the degradation process, the main intermediates of SCP and CIP were examined with UHPLC-MS/MS. Figure S1(a) shows the total ion chromatogram of sulfachloropyridazine (SCP). It can be seen that there are mainly two degradation intermediates. According to the mass-to-charge ratio of the intermediate and the characteristic fragment ions, two possible degradation pathways for degrading CIP are proposed in Fig. S2(b). N atoms and the sulfo group are electron-rich groups, that are prone to electrophilic reactions, these positions are preferentially attacked by ROS, resulting in cleavage of the S-N bond of SCP and conversion of SCP into M<sub>1</sub>, and M<sub>2</sub> is the result of further oxidation of -NH<sub>2</sub>. The ring opening of the chloropyridazine ring further generates small molecule compounds. Eventually mineralized to water, carbon dioxide and other small molecules.

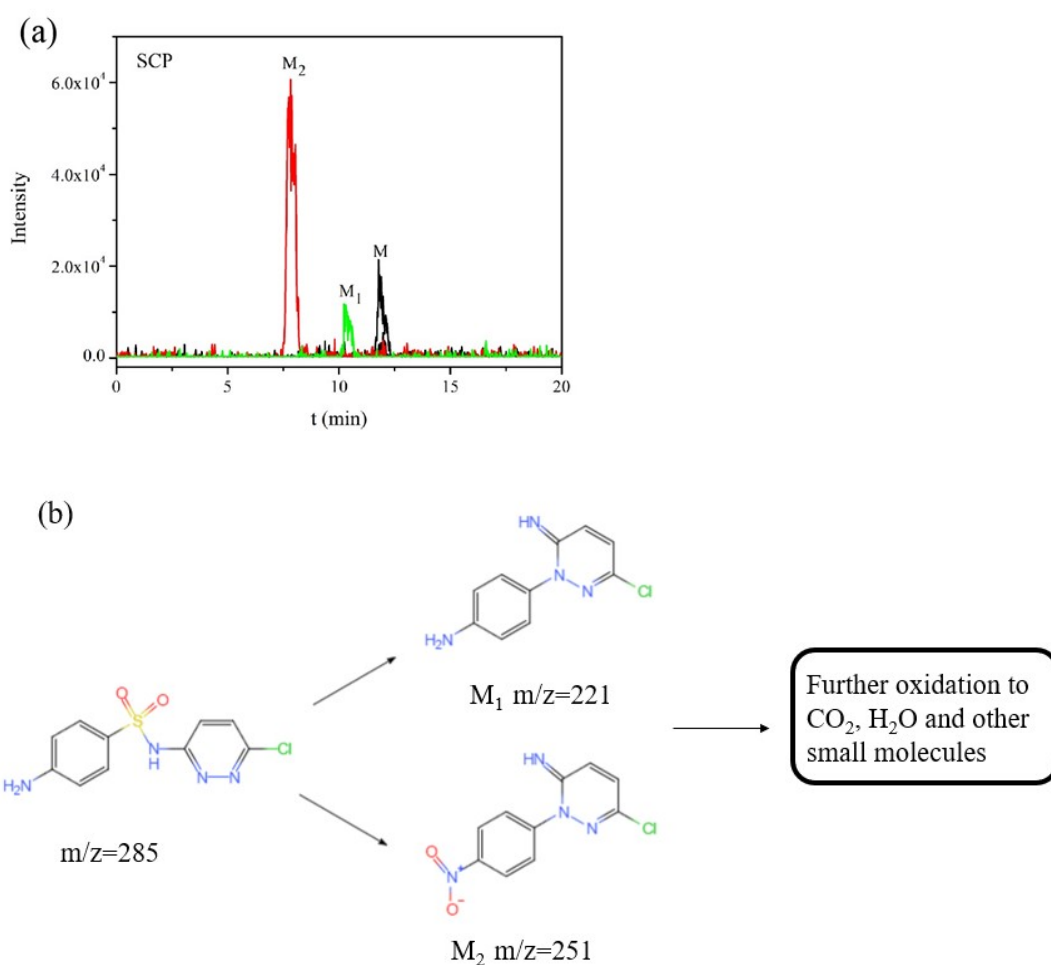

Fig. S1 (a) the total ion chromatogram of SCP

(b) Possible photodegradation pathways of SCP under visible light irradiation

Figure S2(a) shows the total ion chromatogram of ciprofloxacin (CIP). It can be seen that the parent of CIP ( $m/z = 332$ ) was degraded to produce new products. According to the mass-to-charge ratio of the intermediate and the characteristic fragment ions, two possible degradation pathways for degrading CIP are proposed in Fig. S2(b). The cleavage and loss of piperazine ring of CIP could take place through the route  $CIP \rightarrow M_1$  ( $m/z = 334$ )  $\rightarrow M_2$  ( $m/z = 306$ )  $\rightarrow M_3$  ( $m/z = 262$ ), and subsequent loss of amino group, cyclopropyl group, and cyclopropyl group yielded  $M_4$  ( $m/z = 164$ ).  $M_4$  was additionally changed to  $M_5$  ( $m/z = 156$ ) by the cleavage of quinolone ring, which subsequently converted to form  $M_6$  ( $m/z = 154$ ) through the substitution of the F atom with a  $\cdot OH$  through decarboxylation. Eventually mineralized to water, carbon dioxide and other small molecules.

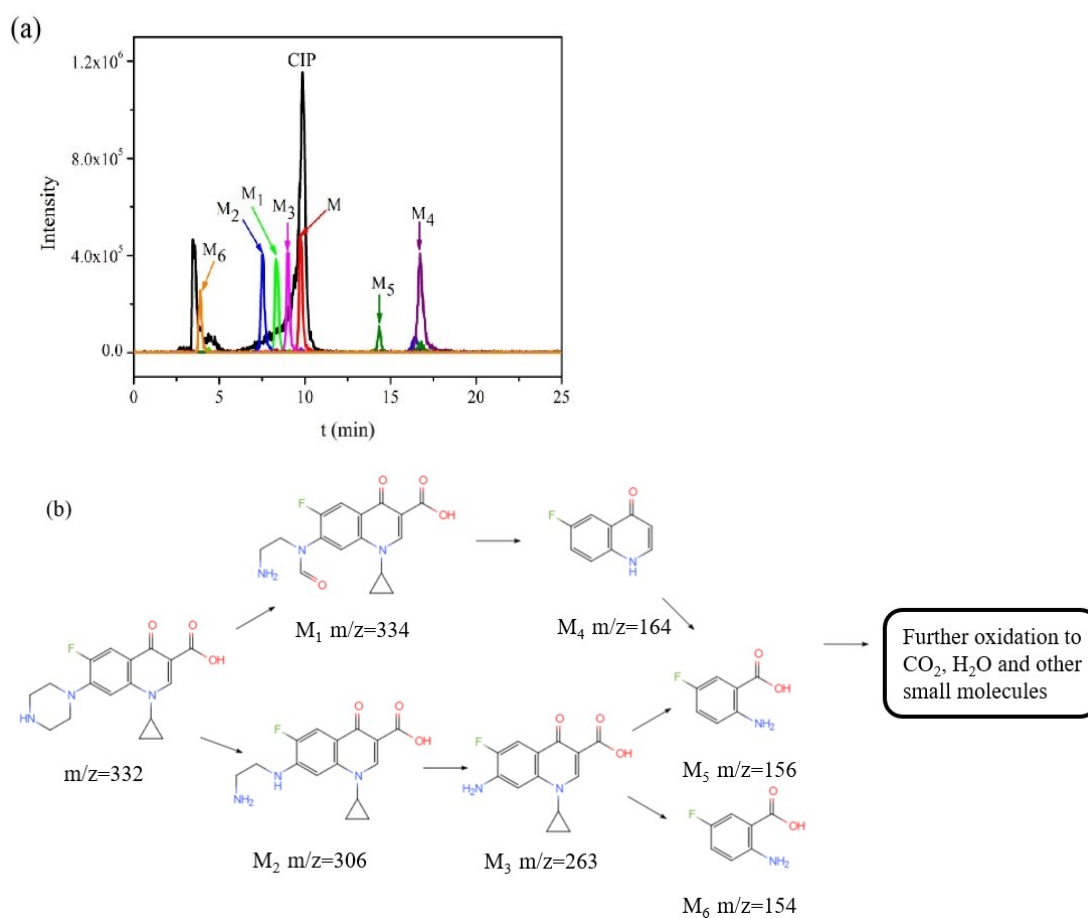

Fig. S2 (a) the total ion chromatogram of CIP

(b) Possible photodegradation pathways of CIP under visible light irradiation

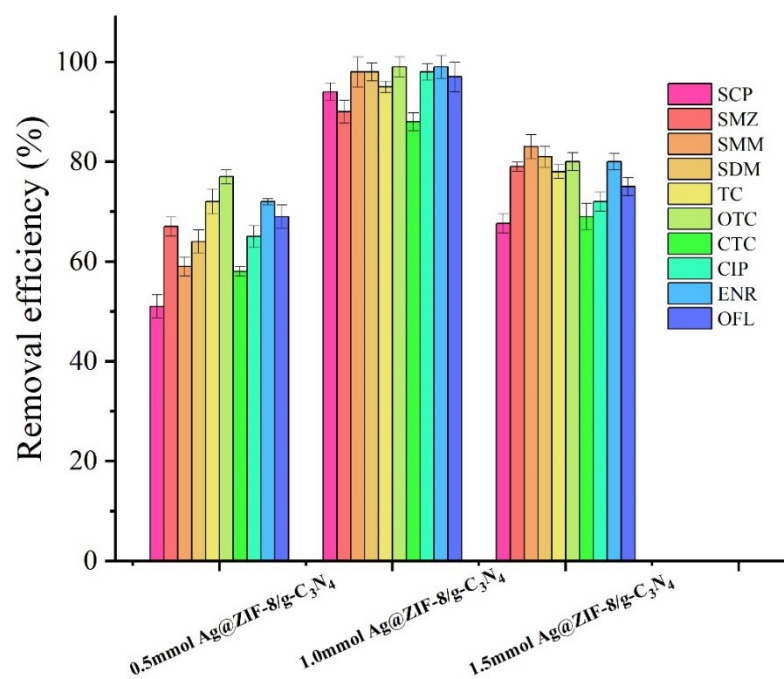

Fig. S3 degradation of antibiotics by Ag@ZIF-8/g-C<sub>3</sub>N<sub>4</sub> with different silver nitrate addition amount as photocatalysts under visible light irradiation

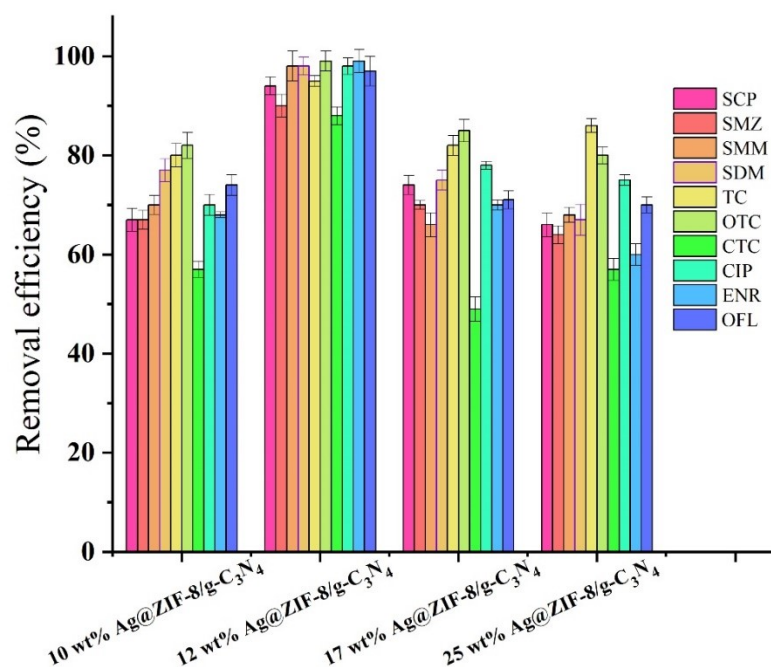

Fig. S4 degradation of antibiotics by Ag@ZIF-8/g-C<sub>3</sub>N<sub>4</sub> with different ratio of Ag@ZIF-8 and g-C<sub>3</sub>N<sub>4</sub> as photocatalysts under visible light irradiation
